# Supplementary figures and images for: Factors Influencing Escalator-Related Incidents in China: A Systematic Analysis Using ISM-DEMATEL Method
Source: MDPI journal article supplement (doi:10.3390/ijerph16142478), 2019-07-11

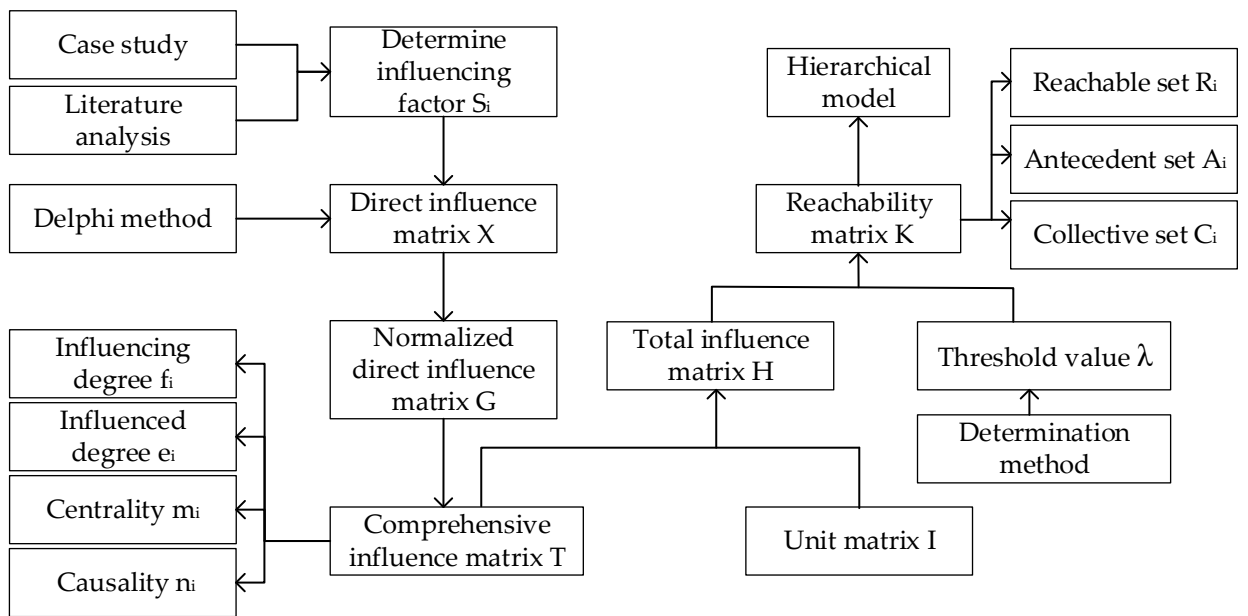

Supplement: s1 [file s1]

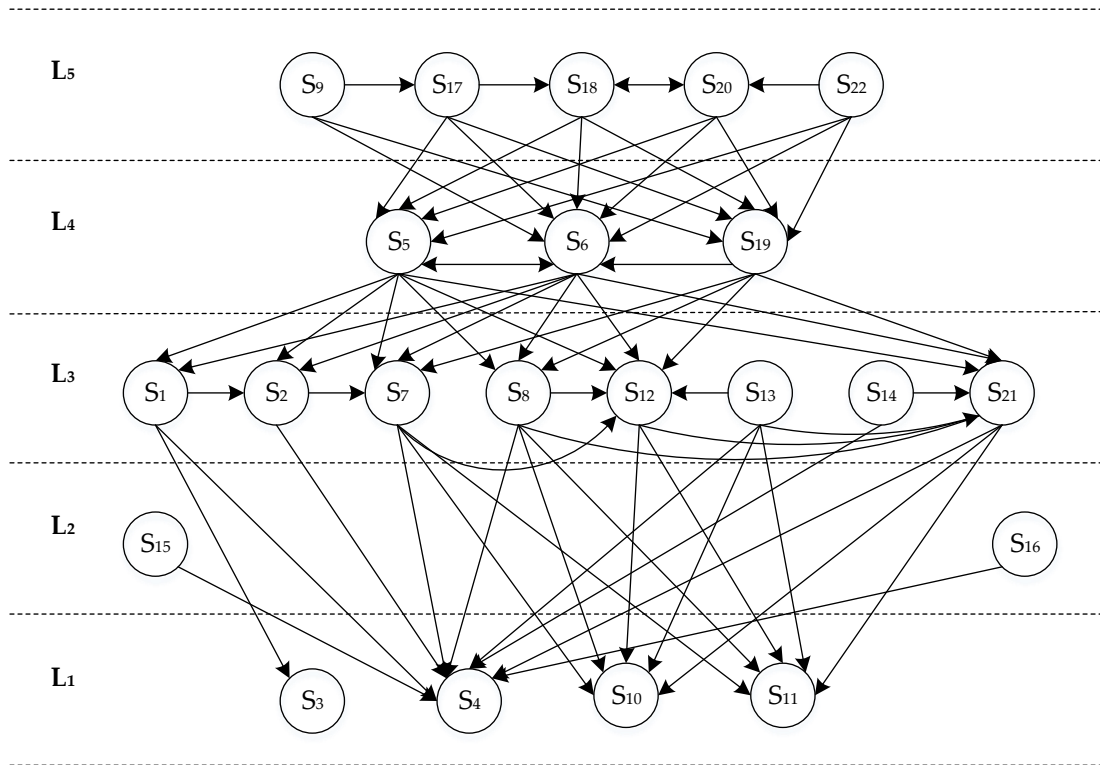

Supplement: s1 [file s1]
